# Supplementary material
Source: PubMed Central journal article supplement (PMC4330585)
Supplement: supp_tpc.114.134338_tpc134338_SupplementalData.pdf [file supp_tpc.114.134338_tpc134338_SupplementalData.pdf]

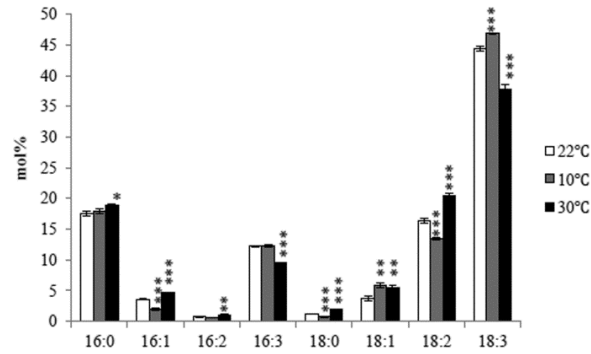

**Supplemental Figure 1** Total fatty acid composition in leaves of Arabidopsis grown at 10, 22 and 30°C. Values are means  $\pm$  SD of mol% ( $n = 4$  individual plant). Statistically significant differences (two-tailed student t-test; \*,  $p < 0.05$ ; \*\*,  $p < 0.01$ ; \*\*\*,  $p < 0.001$ ) were calculated by comparisons between suboptimum temperature treatments (10°C and 30°C) and the standard growth condition (22°C).

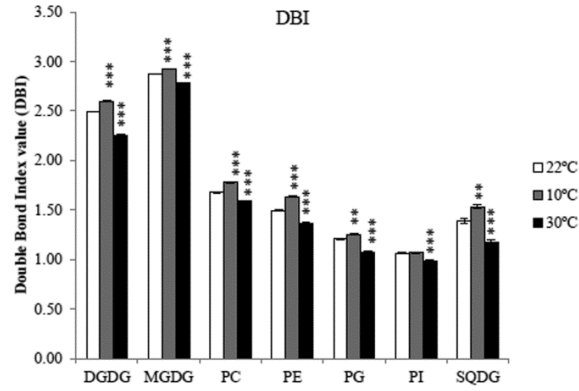

**Supplemental Figure 2** Double bond index (DBI) values of individual lipid species of *Arabidopsis* grown at 10, 22 and 30°C. DBI values are calculated as described in “Materials and Methods”. Values are mean  $\pm$  SD from five biological replicates. \*,  $p < 0.05$ ; \*\*,  $p < 0.01$ ; \*\*\*,  $p < 0.001$ .

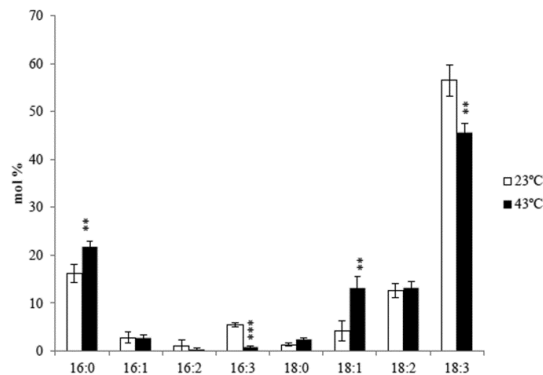

**Supplemental Figure 3 Leaf fatty acid compositions of *A. lentiformis* grown at 23°C and 43°C.** Values represent average of four independent biological replicates. Statistically significant differences were calculated between 43 and 23°C (two-tailed student t-test; \*,  $p < 0.05$ ; \*\*,  $p$  value  $< 0.01$ ; \*\*\*,  $p$  value  $< 0.001$ ).

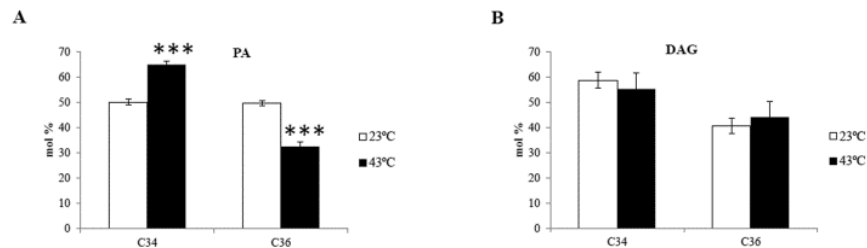

**Supplemental Figure 4** Changes in PA (**A**) and DAG (**B**) subpools in *A. lentiformis* grown at 43°C and 23°C. C34 represents C16/C18 or C18/C16 lipid molecules; C36 represents C18/C18 lipid molecules. Values represent average of five independent biological replicates. Statistically significant differences were calculated between 43°C and 23°C (two-tailed student t-test; \*,  $p < 0.05$ ; \*\*\*,  $p$  value  $< 0.001$ ).

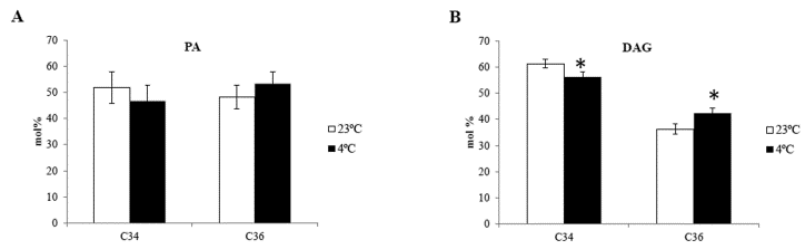

**Supplemental Figure 5** Changes in PA (A) and DAG (B) subpools in wheat grown at 4°C and 23°C. C34 represents C16/C18 or C18/C16 lipid molecules; C36 represents C18/C18 lipid molecules. Values represent average of three independent biological replicates. Statistically significant differences were calculated between 4°C and 23°C (two-tailed student t-test; \*,  $p < 0.05$ ; \*\*\*,  $p$  value  $< 0.001$ ).

**Supplemental Table 1** Leaf glycerolipid composition of *Arabidopsis* grown at 10, 22 and 30°C.

Value represents average of five independent samples. Statistically significant differences (two-tailed student t-test; \*,  $p < 0.05$ ) were calculated by comparisons between temperature treatments (10°C and 30°C) and standard growth condition (22°C), respectively. C16 represents the sum of 16:0, 16:1, 16:2 and 16:3; C18 represents the sum of 18:0, 18:1, 18:2 and 18:3.

| Glycerolipids | Total Polar Lipids (%) | Fatty acid composition (mol%) |                   |             |              |             |                   |              |              | C16/C18      |
|---------------|------------------------|-------------------------------|-------------------|-------------|--------------|-------------|-------------------|--------------|--------------|--------------|
|               |                        | 16:0                          | 16:1 <sup>a</sup> | 16:2        | 16:3         | 18:0        | 18:1 <sup>b</sup> | 18:2         | 18:3         |              |
| <b>DGDG</b>   |                        |                               |                   |             |              |             |                   |              |              |              |
| 10°C          | 15.9 ± 0.15            | 10.7 ± 0.71*                  | 0.3 ± 0.12        | 0.6 ± 0.02* | 3.1 ± 0.07*  | 0.5 ± 0.07* | 0.9 ± 0.24*       | 3.6 ± 0.13*  | 80.3 ± 0.81* | 0.17 ± 0.01* |
| 22°C          | 16.0 ± 0.32            | 12.6 ± 0.31                   | 0.4 ± 0.14        | 0.6 ± 0.01  | 2.8 ± 0.02   | 0.8 ± 0.03  | 1.3 ± 0.34        | 6.3 ± 0.27   | 75.3 ± 0.31  | 0.20 ± 0.00  |
| 30°C          | 17.9 ± 0.39*           | 17.9 ± 0.10*                  | 0.8 ± 0.23        | 0.7 ± 0.04  | 1.7 ± 0.08*  | 1.5 ± 0.12* | 2.1 ± 0.27*       | 9.9 ± 0.26*  | 65.6 ± 0.35* | 0.27 ± 0.00* |
| <b>MGDG</b>   |                        |                               |                   |             |              |             |                   |              |              |              |
| 10°C          | 41.1 ± 0.49*           | 0.8 ± 0.09*                   | 0.4 ± 0.06*       | 1.3 ± 0.03* | 37.5 ± 0.30* | 0.1 ± 0.05  | 0.4 ± 0.12*       | 2.0 ± 0.12*  | 57.4 ± 0.18* | 0.67 ± 0.01* |
| 22°C          | 38.0 ± 0.83            | 1.4 ± 0.11                    | 0.8 ± 0.04        | 1.5 ± 0.02  | 34.9 ± 0.19  | 0.1 ± 0.03  | 0.7 ± 0.14        | 3.7 ± 0.20   | 56.9 ± 0.36  | 0.63 ± 0.01  |
| 30°C          | 38.7 ± 0.60            | 2.2 ± 0.17*                   | 1.6 ± 0.04        | 2.2 ± 0.02* | 29.8 ± 0.35* | 0.2 ± 0.08* | 1.5 ± 0.18*       | 5.9 ± 0.14*  | 56.6 ± 0.21  | 0.56 ± 0.00* |
| <b>PC</b>     |                        |                               |                   |             |              |             |                   |              |              |              |
| 10°C          | 16.6 ± 0.39*           | 26.1 ± 0.78*                  |                   |             |              | 1.5 ± 0.03* | 4.7 ± 0.32        | 30.1 ± 0.23* | 37.6 ± 1.04* | 0.35 ± 0.01* |
| 22°C          | 17.6 ± 0.64            | 28.5 ± 0.50                   |                   |             |              | 2.0 ± 0.03  | 5.0 ± 0.29        | 31.0 ± 0.44  | 33.6 ± 0.75  | 0.40 ± 0.01  |
| 30°C          | 16.1 ± 0.30*           | 28.6 ± 0.19                   |                   |             |              | 3.4 ± 0.09* | 5.3 ± 0.41*       | 34.3 ± 0.42* | 28.4 ± 0.50* | 0.40 ± 0.00  |
| <b>PE</b>     |                        |                               |                   |             |              |             |                   |              |              |              |
| 10°C          | 11.4 ± 0.25*           | 30.2 ± 0.52*                  |                   |             |              | 1.0 ± 0.04* | 4.1 ± 0.41*       | 34.9 ± 0.16* | 29.8 ± 0.48* | 0.43 ± 0.01* |
| 22°C          | 12.4 ± 0.18            | 34.4 ± 0.55                   |                   |             |              | 1.8 ± 0.06  | 2.9 ± 0.37        | 36.0 ± 0.28  | 24.9 ± 0.48  | 0.52 ± 0.01  |
| 30°C          | 10.6 ± 0.11*           | 36.5 ± 1.25*                  |                   |             |              | 3.3 ± 0.20* | 2.8 ± 0.57        | 38.9 ± 0.60* | 18.5 ± 0.66* | 0.58 ± 0.03* |
| <b>PG</b>     |                        |                               |                   |             |              |             |                   |              |              |              |
| 10°C          | 10.1 ± 0.49            | 41.3 ± 0.50*                  | 18.1 ± 0.38*      |             |              | 0.6 ± 0.05* | 2.4 ± 0.37*       | 7.6 ± 0.25*  | 30.0 ± 0.80* | 1.46 ± 0.05* |
| 22°C          | 10.1 ± 0.17            | 32.4 ± 0.71                   | 28.5 ± 0.78       |             |              | 1.0 ± 0.10  | 5.2 ± 0.74        | 11.5 ± 0.47  | 21.4 ± 0.51  | 1.56 ± 0.04  |
| 30°C          | 10.3 ± 0.02            | 29.5 ± 1.50*                  | 33.4 ± 0.91*      |             |              | 1.3 ± 0.12* | 9.0 ± 1.00*       | 14.8 ± 0.90* | 11.9 ± 0.83* | 1.70 ± 0.13* |
| <b>PI</b>     |                        |                               |                   |             |              |             |                   |              |              |              |
| 10°C          | 3.0 ± 0.17             | 54.9 ± 1.26                   |                   |             |              | 1.7 ± 0.45  | 2.3 ± 1.47        | 18.9 ± 0.50* | 22.1 ± 1.01  | 1.22 ± 0.06  |
| 22°C          | 3.5 ± 0.24             | 54.4 ± 1.10                   |                   |             |              | 1.9 ± 0.11  | 2.4 ± 0.71        | 20.3 ± 0.10  | 21.1 ± 0.45  | 1.19 ± 0.05  |
| 30°C          | 3.5 ± 0.12             | 55.0 ± 0.70                   |                   |             |              | 2.7 ± 0.20* | 2.1 ± 0.81        | 23.9 ± 1.16* | 16.4 ± 0.71* | 1.22 ± 0.03  |
| <b>SQDG</b>   |                        |                               |                   |             |              |             |                   |              |              |              |
| 10°C          | 2.0 ± 0.20             | 44.7 ± 1.87                   |                   |             |              | 1.2 ± 0.33* | 2.5 ± 2.20        | 3.9 ± 0.42*  | 47.6 ± 1.99* | 0.81 ± 0.06  |
| 22°C          | 2.3 ± 0.09             | 46.8 ± 2.71                   |                   |             |              | 1.6 ± 0.18  | 3.0 ± 0.66        | 9.7 ± 0.68   | 38.9 ± 1.65  | 0.88 ± 0.10  |
| 30°C          | 2.8 ± 0.13             | 49.8 ± 2.83                   |                   |             |              | 2.6 ± 0.29* | 4.6 ± 2.50*       | 16.6 ± 1.08* | 26.5 ± 1.47* | 1.00 ± 0.12  |

<sup>a</sup> represents sum of 16:1 *cis* and *trans* fatty acids.

<sup>b</sup> represents sum of 18:1 *cis* and *trans* fatty acids.

**Supplemental Table 2** Leaf glycerolipid compositions of *A. lentiformis* grown at 23°C and 43°C.

Values are means  $\pm$  SD ( $n = 3$ ). Statistically significant differences (two-tailed student t-test; \*, p value < 0.05) were calculated between 43°C and 23°C. C16 represents the sum of 16:0, 16:1, 16:2 and 16:3; C18 represents the sum of 18:0, 18:1, 18:2 and 18:3.

| Glycerolipids | Total Polar Lipids (%) | Fatty acid composition (mol%) |                   |              |                 |                 |                   |                  |                  | C16/C18          |
|---------------|------------------------|-------------------------------|-------------------|--------------|-----------------|-----------------|-------------------|------------------|------------------|------------------|
|               |                        | 16:0                          | 16:1 <sup>a</sup> | 16:2         | 16:3            | 18:0            | 18:1 <sup>b</sup> | 18:2             | 18:3             |                  |
| <b>DGDG</b>   |                        |                               |                   |              |                 |                 |                   |                  |                  |                  |
| 23°C          | 21.7 $\pm$ 0.42        | 13.9 $\pm$ 1.18               | 0.4 $\pm$ 0.05    | 0.1 $\pm$ 0  | 2.5 $\pm$ 0.07  | 1.4 $\pm$ 0.06  | 2.5 $\pm$ 0.12    | 4.8 $\pm$ 0.14   | 74.4 $\pm$ 1.16  | 0.20 $\pm$ 0.02  |
| 43°C          | 26.0 $\pm$ 0.13*       | 26.8 $\pm$ 0.5*               | 0.5 $\pm$ 0.01    | 0.1 $\pm$ 0  | 0.2 $\pm$ 0*    | 4.2 $\pm$ 0.04* | 8.6 $\pm$ 0.27*   | 13.7 $\pm$ 0.16* | 45.8 $\pm$ 0.39* | 0.38 $\pm$ 0.01* |
| <b>MGDG</b>   |                        |                               |                   |              |                 |                 |                   |                  |                  |                  |
| 23°C          | 41.9 $\pm$ 0.31        | 1.5 $\pm$ 0.21                | 0.4 $\pm$ 0.02    | 0.6 $\pm$ 0  | 14.6 $\pm$ 0.25 | 0.2 $\pm$ 0.03  | 1.7 $\pm$ 0.24    | 2.3 $\pm$ 0.3    | 78.6 $\pm$ 0.46  | 0.21 $\pm$ 0.00  |
| 43°C          | 35.9 $\pm$ 0.62*       | 7.6 $\pm$ 0.21*               | 0.7 $\pm$ 0.02*   | 0.8 $\pm$ 0* | 2.7 $\pm$ 0.01* | 0.8 $\pm$ 0.01* | 5.5 $\pm$ 0.16*   | 10.9 $\pm$ 0.06* | 71 $\pm$ 0.42*   | 0.13 $\pm$ 0.00* |
| <b>PC</b>     |                        |                               |                   |              |                 |                 |                   |                  |                  |                  |
| 23°C          | 14.8 $\pm$ 0.80        | 26.1 $\pm$ 1.83               |                   |              |                 | 2.5 $\pm$ 0.64  | 17.8 $\pm$ 0.49   | 28.3 $\pm$ 1.12  | 24.5 $\pm$ 1.46  | 0.37 $\pm$ 0.03  |
| 43°C          | 16.4 $\pm$ 0.51*       | 30.6 $\pm$ 0.62*              |                   |              |                 | 2.6 $\pm$ 0.05  | 37.8 $\pm$ 0.76*  | 13.6 $\pm$ 0.26* | 14.5 $\pm$ 0.58* | 0.46 $\pm$ 0.02* |
| <b>PE</b>     |                        |                               |                   |              |                 |                 |                   |                  |                  |                  |
| 23°C          | 6.8 $\pm$ 0.25         | 23.9 $\pm$ 0.45               |                   |              |                 | 1.8 $\pm$ 0.29  | 9.7 $\pm$ 0.66    | 42.7 $\pm$ 0.55  | 21.5 $\pm$ 0.19  | 0.32 $\pm$ 0.01  |
| 43°C          | 6.8 $\pm$ 0.23         | 31.5 $\pm$ 0.54*              |                   |              |                 | 2.6 $\pm$ 0.3*  | 20.9 $\pm$ 0.35*  | 25.3 $\pm$ 0.35* | 19.2 $\pm$ 0.2*  | 0.47 $\pm$ 0.01* |
| <b>PG</b>     |                        |                               |                   |              |                 |                 |                   |                  |                  |                  |
| 23°C          | 8.9 $\pm$ 0.22         | 35.5 $\pm$ 0.26               | 23.6 $\pm$ 0.4    |              |                 | 1.1 $\pm$ 0.16  | 4 $\pm$ 0.15      | 13.4 $\pm$ 0.39  | 22.2 $\pm$ 0.42  | 1.45 $\pm$ 0.03  |
| 43°C          | 7.0 $\pm$ 0.19*        | 45 $\pm$ 0.48*                | 23.4 $\pm$ 0.22   |              |                 | 2.3 $\pm$ 0.04* | 10.2 $\pm$ 0.16*  | 13.2 $\pm$ 0.27  | 5.8 $\pm$ 0.28*  | 2.17 $\pm$ 0.07* |
| <b>PI</b>     |                        |                               |                   |              |                 |                 |                   |                  |                  |                  |
| 23°C          | 2.4 $\pm$ 0.06         | 46.8 $\pm$ 1.91               |                   |              |                 | 3.7 $\pm$ 0.8   | 8.1 $\pm$ 0.22    | 23.1 $\pm$ 1.57  | 18.4 $\pm$ 1.01  | 0.88 $\pm$ 0.07  |
| 43°C          | 4.1 $\pm$ 0.28*        | 47.5 $\pm$ 0.75               |                   |              |                 | 3.4 $\pm$ 0.26  | 14.7 $\pm$ 0.14*  | 17.3 $\pm$ 0.11* | 17.1 $\pm$ 0.47  | 0.90 $\pm$ 0.03  |
| <b>SQDG</b>   |                        |                               |                   |              |                 |                 |                   |                  |                  |                  |
| 23°C          | 3.6 $\pm$ 0.83         | 48.5 $\pm$ 0.78               |                   |              |                 | 1.8 $\pm$ 0.18  | 2.8 $\pm$ 0.31    | 11.8 $\pm$ 0.16  | 35.1 $\pm$ 1.13  | 0.94 $\pm$ 0.03  |
| 43°C          | 3.7 $\pm$ 0.57         | 54.1 $\pm$ 5.48               |                   |              |                 | 3.4 $\pm$ 0.09* | 10.6 $\pm$ 1.27*  | 14.4 $\pm$ 2.11  | 17.4 $\pm$ 2.05* | 1.20 $\pm$ 0.25  |

<sup>a</sup> represents sum of 16:1 *cis* and *trans* fatty acids.

<sup>b</sup> represents sum of 18:1 *cis* and *trans* fatty acids.

**Supplemental Table 3** Fatty acid composition of plants grown at 22°C (10 days) and after exposure to 5°C for 3 weeks. C16 represents the sum of 16:0 and 16:1; C18 represents the sum of 18:0, 18:1, 18:2 and 18:3. DBI, Double Bond Index.

| Temperature treatment | Plants      | Fatty acid composition (mol%) |                   |          |          |          |                   |           |           | C16/C18    | DBI        |
|-----------------------|-------------|-------------------------------|-------------------|----------|----------|----------|-------------------|-----------|-----------|------------|------------|
|                       |             | 16:0                          | 16:1 <sup>a</sup> | 16:2     | 16:3     | 18:0     | 18:1 <sup>b</sup> | 18:2      | 18:3      |            |            |
| 22°C, 10 days         | WT          | 17.1±0.4                      | 2.6±0.1           | 0.6±0.0  | 11.1±0.2 | 1.9±0.1  | 3.2±0.1           | 17.5±1.0  | 45.9±1.3  | 0.46±0.01  | 2.13±0.02  |
|                       | <i>gly1</i> | 15.9±0.6*                     | 2.4±0.3           | 0.4±0.0* | 4.3±0.1* | 1.5±0.0* | 4.3±0.1*          | 20.3±0.5* | 51.0±0.0* | 0.30±0.01* | 2.14±0.01  |
|                       | <i>fad5</i> | 25.5±0.3*                     | 3.0±0.1*          | 0.0±0.0* | 0.0±0.0* | 2.0±0.2  | 2.8±0.1*          | 18.1±0.4  | 48.6±0.6* | 0.40±0.00* | 1.88±0.01* |
|                       | <i>act1</i> | 15.2±1.0*                     | 2.4±0.2           | 0.0±0.0* | 0.5±0.0* | 2.0±0.0  | 7.0±0.6*          | 21.6±0.8* | 51.5±2.3* | 0.22±0.02* | 2.08±0.05  |
| 5°C, 3 weeks          | WT          | 15.9±0.3                      | 1.9±0.4           | 0.5±0.0  | 12.7±0.5 | 0.6±0.2  | 3.0±0.4           | 12.7±0.2  | 52.7±0.2  | 0.45±0.00  | 2.28±0.02  |
|                       | <i>gly1</i> | 14.2±0.1*                     | 1.4±0.0           | 0.1±0.0* | 3.2±0.1* | 0.5±0.0  | 5.6±0.1*          | 21.1±0.2* | 54.0±0.2* | 0.23±0.00* | 2.21±0.01* |
|                       | <i>fad5</i> | 21.8±0.1*                     | 1.7±0.3           | 0.0±0.0* | 0.0±0.0* | 0.7±0.2  | 3.4±0.1           | 16.5±0.1* | 55.8±0.3* | 0.31±0.01* | 2.06±0.01* |
|                       | <i>act1</i> | 12.9±0.1*                     | 1.5±0.1           | 0.1±0.0* | 1.0±0.0* | 0.4±0.0  | 6.3±0.1*          | 22.3±0.1* | 55.4±0.4* | 0.18±0.00* | 2.22±0.01* |

<sup>a</sup> represents sum of 16:1 *cis* and *trans* fatty acids.

<sup>b</sup> represents sum of 18:1 *cis* and *trans* fatty acids.



**Supplemental Table 4** Leaf glycerolipid composition of wheat at 23°C and 4°C.

Values are means  $\pm$  SD (n = 3). Statistically significant differences (\*, p value < 0.05) were calculated between 4°C and 23°C. C16 represents the sum of 16:0 and 16:1; C18 represents the sum of 18:0, 18:1, 18:2 and 18:3.

| Glycerolipids | Total Polar Lipids (%) | Fatty acid composition (mol%) |                   |                 |                   |                  | C16/C18          |                  |
|---------------|------------------------|-------------------------------|-------------------|-----------------|-------------------|------------------|------------------|------------------|
|               |                        | 16:0                          | 16:1 <sup>a</sup> | 18:0            | 18:1 <sup>b</sup> | 18:2             |                  | 18:3             |
| <b>DGDG</b>   |                        |                               |                   |                 |                   |                  |                  |                  |
| 23°C          | 24.9 $\pm$ 0.50        | 9 $\pm$ 0.08                  |                   | 1.1 $\pm$ 0.07  | 0.7 $\pm$ 0.01    | 2.2 $\pm$ 0.04   | 87 $\pm$ 0.18    | 0.10 $\pm$ 0.00  |
| 4°C           | 26.4 $\pm$ 0.23*       | 7.7 $\pm$ 0.15*               |                   | 0.9 $\pm$ 0.05* | 0.8 $\pm$ 0.26    | 1.8 $\pm$ 0.47   | 88.8 $\pm$ 0.91* | 0.08 $\pm$ 0.00* |
| <b>MGDG</b>   |                        |                               |                   |                 |                   |                  |                  |                  |
| 23°C          | 42.7 $\pm$ 2.06        | 1 $\pm$ 0.03                  |                   | 0.2 $\pm$ 0.02  | 0.4 $\pm$ 0.01    | 3.7 $\pm$ 0.03   | 94.6 $\pm$ 0.08  | 0.01 $\pm$ 0.00  |
| 4°C           | 35.1 $\pm$ 0.25*       | 1.1 $\pm$ 0.04                |                   | 0.2 $\pm$ 0.01  | 0.4 $\pm$ 0.04    | 1.9 $\pm$ 0.06*  | 96.4 $\pm$ 0.08* | 0.01 $\pm$ 0.00  |
| <b>PC</b>     |                        |                               |                   |                 |                   |                  |                  |                  |
| 23°C          | 11.1 $\pm$ 0.40        | 24.3 $\pm$ 0.09               |                   | 1.4 $\pm$ 0.09  | 4.6 $\pm$ 0.11    | 42.8 $\pm$ 0.5   | 26.8 $\pm$ 0.62  | 0.32 $\pm$ 0.00  |
| 4°C           | 15.5 $\pm$ 0.50*       | 21.4 $\pm$ 0.86*              |                   | 1.3 $\pm$ 0.1   | 3.5 $\pm$ 0.57    | 39.2 $\pm$ 0.65* | 34.6 $\pm$ 0.86* | 0.27 $\pm$ 0.01* |
| <b>PE</b>     |                        |                               |                   |                 |                   |                  |                  |                  |
| 23°C          | 4.6 $\pm$ 0.34         | 25 $\pm$ 0.44                 |                   | 1.5 $\pm$ 0.14  | 1.4 $\pm$ 0.33    | 49.3 $\pm$ 0.58  | 22.8 $\pm$ 0.21  | 0.33 $\pm$ 0.01  |
| 4°C           | 8.0 $\pm$ 0.25*        | 24.3 $\pm$ 0.52               |                   | 1 $\pm$ 0.23*   | 0.9 $\pm$ 0.01*   | 41.4 $\pm$ 0.33* | 32.4 $\pm$ 0.47* | 0.32 $\pm$ 0.01  |
| <b>PG</b>     |                        |                               |                   |                 |                   |                  |                  |                  |
| 23°C          | 10.2 $\pm$ 0.48        | 14.5 $\pm$ 0.13               | 37.5 $\pm$ 0.22   | 0.9 $\pm$ 0.18  | 1 $\pm$ 0.02      | 6.2 $\pm$ 0.09   | 39.8 $\pm$ 0.41  | 1.08 $\pm$ 0.01  |
| 4°C           | 9.9 $\pm$ 0.28         | 20.6 $\pm$ 0.26*              | 28.8 $\pm$ 0.72*  | 0.8 $\pm$ 0.08  | 1 $\pm$ 0.07      | 6.6 $\pm$ 0.34   | 42.1 $\pm$ 0.44* | 0.98 $\pm$ 0.03* |
| <b>PI</b>     |                        |                               |                   |                 |                   |                  |                  |                  |
| 23°C          | 1.3 $\pm$ 0.17         | 52.9 $\pm$ 3.78               |                   | 4.1 $\pm$ 3.96  | 0                 | 23 $\pm$ 1.05    | 20 $\pm$ 0.82    | 1.13 $\pm$ 0.18  |
| 4°C           | 1.4 $\pm$ 0.03         | 46.4 $\pm$ 2.22               |                   | 3.3 $\pm$ 0.1   | 1 $\pm$ 1.78      | 21.4 $\pm$ 0.67  | 27.9 $\pm$ 1.11* | 0.87 $\pm$ 0.08  |
| <b>SQDG</b>   |                        |                               |                   |                 |                   |                  |                  |                  |
| 23°C          | 5.3 $\pm$ 0.30         | 25.5 $\pm$ 0.64               |                   | 2 $\pm$ 0.41    | 0                 | 4.6 $\pm$ 0.69   | 68 $\pm$ 1.33    | 0.34 $\pm$ 0.01  |
| 4°C           | 3.7 $\pm$ 0.11*        | 25.3 $\pm$ 1.1                |                   | 1.9 $\pm$ 0.11  | 0                 | 1.4 $\pm$ 0.31*  | 71.3 $\pm$ 1.3   | 0.34 $\pm$ 0.02  |

<sup>a</sup> represents sum of 16:1 *cis* and *trans* fatty acids.

<sup>b</sup> represents sum of 18:1 *cis* and *trans* fatty acids.

**Supplemental Table 5.** Primers pairs used for in this study.

| Gene Name     | AGI ID           | Forward primer (5'→3') | Reverse primer (5'→3') |
|---------------|------------------|------------------------|------------------------|
| <i>ACTIN2</i> | <i>AT3G18780</i> | AACCCAAAGGCCAACAGAGA   | AAGGTCACGTCCAGCAAGGT   |
| <i>AAPT1</i>  | <i>AT1G13560</i> | GGGAACGCGGAAGAAACGCA   | CCCCTATAGAGAGCGGCGAA   |
| <i>AAPT2</i>  | <i>AT3G25585</i> | TTTGATTCTTGTGGGAAG     | GAACCCCGTCGTTGAGTCTA   |
| <i>ATPIS1</i> | <i>AT1G68000</i> | GGCTTTGACATTGTTGCGTT   | GATCAAGGCTTCTGCTGCT    |
| <i>ATPIS2</i> | <i>AT4G38570</i> | CTGTGGATGGATGGTGCCT    | AGAAGACAGGCTGTGCTGAC   |
| <i>NMT1</i>   | <i>AT3G18000</i> | CCCGATTGACGTTGTGCGA    | TGGCCTTCGACGGCGAGTCT   |
| <i>PECT1</i>  | <i>AT2G38670</i> | TTCTGGCGTGCCGCTACGTG   | GCTCTCGGCTACTGTCCCAT   |
| <i>FAD2</i>   | <i>AT3G12120</i> | CCTTCCTCCTCGTCCCTTAC   | CTCTTTGAGGGATCCAGTG    |
| <i>FAD3</i>   | <i>AT2G29980</i> | TCAAACCCTTTCTTACCACA   | TTGGTCCATAGCAACAACCA   |
| <i>PGPS2</i>  | <i>AT3G55030</i> | TGTCGCCACCGCCCTTCTTC   | TCCACCGTCGCGGTGTCTTC   |
| <i>MGD2</i>   | <i>AT5G20410</i> | ACGGTCATGGCCCTTGCAGA   | CCGTCGCCGCTTGTACGGA    |
| <i>MGD3</i>   | <i>AT2G11810</i> | CACTGATTTGCGGCCTCCCA   | GGGTGAAAACCTCCAGCCCCA  |
| <i>DGD1</i>   | <i>AT3G11670</i> | GTGCAAGAAGCAATGACGA    | GTTGCTGCTTCCCAAGAGAG   |
| <i>DGD2</i>   | <i>AT4G00550</i> | GTGTGTTTTCGTCATCTTC    | CCAAAAGCTGTTCTGGAAG    |
| <i>ACT1</i>   | <i>AT1G32200</i> | TTCTCGCGCGCGGCTTAGTG   | GCTCACTCGGCGTCTCACCG   |
| <i>ATS2</i>   | <i>AT4G30580</i> | GCCAACGGGTAGTGAAGGTA   | GTTGCAAAGAACATCCGCTT   |
| <i>PGP1</i>   | <i>AT2G39290</i> | TCTTACC GCCTCCGTCGCA   | GCGGCGACACGACCAAGTGT   |
| <i>PAP1</i>   | <i>AT2G01180</i> | GTCAAGGAAGGCCACAAGAG   | GCCTTGATTTTGCCAGAGAG   |
| <i>MGD1</i>   | <i>AT4G31780</i> | GTTACATCGCTGGTCAAGAG   | TGCCGGTCCAAACCAATCCG   |
| <i>FAD5</i>   | <i>AT3G15850</i> | TGGGTTTTGTTTCAGTCACA   | TAGGTGGTTCGAAGGAATCG   |
| <i>FAD6</i>   | <i>AT4G30950</i> | CCGTGGTATCTGCTACCGTT   | TAGGAAGGCGAGAGTACCCA   |
| <i>FAD7</i>   | <i>AT3G11170</i> | TCGCTATCGTCTTTGCATTG   | GCCAATAGAGAGGCCAAACA   |
| <i>FAD8</i>   | <i>AT5G05580</i> | TCCTTTGCCTGAAAGCATCT   | GAAAGGGTATGCGAGCATTG   |
| <i>SQD1</i>   | <i>AT4G33030</i> | CCCGGCAAAGCTGGTGAGT    | GCCCAAGCTTTGAACCCGCT   |
| <i>SQD2</i>   | <i>AT5G01220</i> | GCAAGCTCCGCTTCTGTGGA   | AGCGGCGCATCAATCTCCGA   |
